# Supplementary material for: Gender Moderates the Mediating Pathway between Social Deprivation, Body Mass Index and Physical Activity
Source: bioRxiv or medRxiv preprint supplement (doi:10.1101/2022.04.18.22273963), 2022-10-18
Supplement: Supplementary file [file media-1.pdf]

# **Gender Moderates the Mediating Pathway between Social Deprivation, Body Mass Index and Physical Activity**

## **Supplementary material**

**Table 1.** Estimates for all predictors in the models including area deprivation (Study 1).

**Table 2.** Estimates for all predictors in the models including material deprivation (Study 2).

**Table 3.** Estimates for all predictors in the models including social deprivation (Study 2).

**Table 1.** Estimates for all predictors in the models including area deprivation (Study 1).

| Predictors                            | Model 1a (BMI as outcome) |               |        | Model 1b (BMI as outcome) |               |        | Model 2a (PA as outcome) |               |        | Model 2b (PA as outcome) |               |        |
|---------------------------------------|---------------------------|---------------|--------|---------------------------|---------------|--------|--------------------------|---------------|--------|--------------------------|---------------|--------|
|                                       | b                         | 95% CI        | p      | b                         | 95% CI        | p      | b                        | 95% CI        | p      | b                        | 95% CI        | p      |
| Intercept                             | -0.52                     | -1.40 – 0.35  | 0.240  | -0.33                     | -1.20 – 0.54  | 0.461  | -0.38                    | -1.21 – 0.45  | 0.372  | -0.42                    | -1.25 – 0.41  | 0.322  |
| Area deprivation                      | 0.19                      | 0.16 – 0.22   | <0.001 | 0.15                      | 0.12 – 0.18   | <0.001 | -0.29                    | -0.32 – -0.26 | <0.001 | -0.29                    | -0.32 – -0.26 | <0.001 |
| BMI                                   | -                         | -             | -      | -                         | -             | -      | -0.05                    | -0.08 – -0.03 | <0.001 | -0.05                    | -0.08 – -0.02 | <0.001 |
| Gender (ref: men)                     | -                         | -             | -      | 0.14                      | 0.08 – 0.19   | <0.001 | -0.05                    | -0.08 – -0.03 | <0.001 | -0.19                    | -0.24 – -0.14 | <0.001 |
| Area deprivation x gender             | -                         | -             | -      | 0.17                      | 0.11 – 0.22   | <0.001 | -                        | -             | -      | 0.06                     | 0.00 – 0.11   | 0.035  |
| BMI x gender                          | -                         | -             | -      | -                         | -             | -      | -                        | -             | -      | 0.02                     | -0.04 – 0.07  | 0.505  |
| Age                                   | -0.06                     | -0.09 – -0.04 | <0.001 | -0.06                     | -0.08 – -0.03 | <0.001 | -0.08                    | -0.10 – -0.05 | <0.001 | -0.09                    | -0.11 – -0.06 | <0.001 |
| <i>Employment status (ref: Carer)</i> |                           |               |        |                           |               |        |                          |               |        |                          |               |        |
| Employed full time                    | 0.69                      | -0.18 – 1.56  | 0.122  | 0.47                      | -0.40 – 1.34  | 0.291  | 0.37                     | -0.46 – 1.20  | 0.384  | 0.43                     | -0.40 – 1.26  | 0.306  |
| Employed full time / part time        | 0.65                      | -0.22 – 1.52  | 0.145  | 0.40                      | -0.46 – 1.27  | 0.361  | 0.07                     | -0.76 – 0.90  | 0.867  | 0.14                     | -0.69 – 0.96  | 0.747  |
| Employed part time                    | 0.45                      | -0.43 – 1.33  | 0.314  | 0.23                      | -0.65 – 1.11  | 0.607  | 0.47                     | -0.37 – 1.30  | 0.273  | 0.58                     | -0.25 – 1.42  | 0.169  |
| Long-term sick/disabled               | 0.89                      | -0.51 – 2.29  | 0.211  | 0.72                      | -0.68 – 2.11  | 0.314  | 0.26                     | -1.07 – 1.59  | 0.706  | 0.19                     | -1.13 – 1.52  | 0.774  |
| Looking after home / family full      | 0.25                      | -0.71 – 1.21  | 0.609  | 0.02                      | -0.94 – 0.98  | 0.965  | 0.24                     | -0.68 – 1.15  | 0.612  | 0.38                     | -0.53 – 1.30  | 0.410  |
| Looking after home / family full      | 0.64                      | -0.25 – 1.54  | 0.159  | 0.42                      | -0.47 – 1.32  | 0.350  | 0.10                     | -0.75 – 0.95  | 0.816  | 0.16                     | -0.69 – 1.01  | 0.708  |
| Other                                 | 0.64                      | -0.25 – 1.54  | 0.159  | 0.42                      | -0.47 – 1.32  | 0.350  | 0.10                     | -0.75 – 0.95  | 0.816  | 0.16                     | -0.69 – 1.01  | 0.708  |

|                                  |       |               |       |       |               |        |       |              |        |       |              |        |
|----------------------------------|-------|---------------|-------|-------|---------------|--------|-------|--------------|--------|-------|--------------|--------|
| Permanently sick                 | 0.78  | -0.22 – 1.78  | 0.127 | 0.57  | -0.43 – 1.57  | 0.267  | -0.03 | -0.98 – 0.92 | 0.951  | 0.10  | -0.85 – 1.05 | 0.829  |
| Retired                          | 0.50  | -0.37 – 1.37  | 0.264 | 0.26  | -0.61 – 1.13  | 0.562  | 0.31  | -0.51 – 1.14 | 0.456  | 0.39  | -0.43 – 1.22 | 0.351  |
| Self-employed                    | 0.40  | -0.51 – 1.32  | 0.386 | 0.17  | -0.74 – 1.09  | 0.710  | 1.02  | 0.15 – 1.89  | 0.021  | 1.06  | 0.19 – 1.93  | 0.017  |
| Student                          | 0.42  | -0.68 – 1.51  | 0.455 | 0.17  | -0.93 – 1.26  | 0.763  | -0.29 | -1.34 – 0.75 | 0.581  | -0.30 | -1.34 – 0.74 | 0.569  |
| Unemployed                       | 0.59  | -0.28 – 1.46  | 0.185 | 0.39  | -0.48 – 1.26  | 0.375  | 0.10  | -0.73 – 0.93 | 0.806  | 0.15  | -0.68 – 0.97 | 0.728  |
| Unknown                          | 0.65  | -0.21 – 1.51  | 0.141 | 0.42  | -0.44 – 1.28  | 0.337  | 0.23  | -0.59 – 1.05 | 0.579  | 0.29  | -0.53 – 1.11 | 0.483  |
| Volunteer                        | 1.77  | -0.33 – 3.86  | 0.098 | 1.49  | -0.59 – 3.58  | 0.161  | -0.26 | -2.25 – 1.73 | 0.799  | -0.14 | -2.12 – 1.84 | 0.889  |
| <i>Ethnicity (ref : African)</i> |       |               |       |       |               |        |       |              |        |       |              |        |
| Arab                             | 0.17  | -1.18 – 1.53  | 0.801 | 0.14  | -1.21 – 1.49  | 0.837  | -0.15 | -1.44 – 1.14 | 0.815  | -0.21 | -1.49 – 1.07 | 0.751  |
| Bangladeshi                      | -0.33 | -1.20 – 0.53  | 0.450 | -0.19 | -1.06 – 0.67  | 0.658  | 0.48  | -0.35 – 1.30 | 0.257  | 0.41  | -0.41 – 1.22 | 0.332  |
| British                          | -0.02 | -0.18 – 0.15  | 0.846 | -0.01 | -0.17 – 0.16  | 0.924  | 0.46  | 0.31 – 0.62  | <0.001 | 0.47  | 0.32 – 0.63  | <0.001 |
| Caribbean                        | -0.01 | -0.18 – 0.16  | 0.901 | -0.04 | -0.21 – 0.13  | 0.648  | -0.00 | -0.17 – 0.16 | 0.985  | 0.02  | -0.15 – 0.18 | 0.853  |
| Chinese                          | -0.73 | -1.53 – 0.06  | 0.072 | -0.78 | -1.57 – 0.02  | 0.055  | 0.03  | -0.73 – 0.78 | 0.948  | 0.05  | -0.70 – 0.81 | 0.887  |
| Indian                           | 0.14  | -0.26 – 0.54  | 0.490 | 0.11  | -0.28 – 0.51  | 0.573  | -0.10 | -0.48 – 0.28 | 0.594  | -0.05 | -0.42 – 0.33 | 0.809  |
| Irish                            | -0.32 | -0.83 – 0.20  | 0.227 | -0.33 | -0.84 – 0.18  | 0.206  | 0.31  | -0.18 – 0.80 | 0.218  | 0.28  | -0.21 – 0.77 | 0.259  |
| Other Asian                      | -0.19 | -0.58 – 0.19  | 0.330 | -0.24 | -0.63 – 0.14  | 0.219  | 0.02  | -0.34 – 0.39 | 0.895  | 0.05  | -0.31 – 0.42 | 0.778  |
| Other Black                      | -0.33 | -0.65 – -0.01 | 0.045 | -0.35 | -0.67 – -0.03 | 0.031  | -0.02 | -0.32 – 0.29 | 0.908  | -0.01 | -0.31 – 0.30 | 0.963  |
| Other Ethnic                     | -0.78 | -1.23 – -0.33 | 0.001 | -0.86 | -1.30 – -0.41 | <0.001 | -0.02 | -0.44 – 0.41 | 0.939  | 0.00  | -0.42 – 0.43 | 0.994  |
| Other Mixed                      | -0.52 | -1.06 – 0.03  | 0.065 | -0.52 | -1.06 – 0.03  | 0.062  | -0.03 | -0.55 – 0.49 | 0.913  | -0.03 | -0.54 – 0.49 | 0.923  |
| Other White                      | -0.26 | -0.54 – 0.03  | 0.077 | -0.26 | -0.54 – 0.02  | 0.072  | 0.03  | -0.24 – 0.30 | 0.813  | 0.03  | -0.23 – 0.30 | 0.801  |
| Pakistani                        | 0.03  | -0.70 – 0.77  | 0.926 | -0.02 | -0.75 – 0.71  | 0.961  | -0.14 | -0.84 – 0.56 | 0.701  | -0.11 | -0.80 – 0.59 | 0.762  |
| Unknown/<br>Withheld             | -0.12 | -0.27 – 0.02  | 0.101 | -0.13 | -0.27 – 0.02  | 0.088  | 0.11  | -0.02 – 0.25 | 0.107  | 0.12  | -0.02 – 0.25 | 0.098  |
| White and<br>Asian               | -0.84 | -1.95 – 0.27  | 0.138 | -0.87 | -1.97 – 0.24  | 0.125  | -0.61 | -1.66 – 0.45 | 0.262  | -0.60 | -1.65 – 0.46 | 0.266  |
| White and<br>Black African       | -0.00 | -0.52 – 0.51  | 0.990 | 0.06  | -0.46 – 0.57  | 0.828  | 0.26  | -0.23 – 0.75 | 0.306  | 0.23  | -0.26 – 0.71 | 0.364  |
| White and<br>Black<br>Caribbean  | -0.19 | -0.59 – 0.20  | 0.335 | -0.20 | -0.59 – 0.19  | 0.308  | -0.06 | -0.44 – 0.31 | 0.734  | -0.06 | -0.43 – 0.31 | 0.741  |

*Note:* BMI: body mass index; PA: Physical activity status. Model 1b and Model 2b included interaction terms between gender and area deprivation on BMI (Model 1b) and between gender and area deprivation and BMI and gender on physical activity (Model 2b). Unstandardized b coefficients their 95% confidence intervals (95% CI) are reported.

**Table 2.** Estimates for all predictors in the models including material deprivation (Study 2).

| Predictors                    | Model 1a (BMI as outcome) |               |        | Model 1b (BMI as outcome) |               |        | Model 2a (PA as outcome) |             |        | Model 2b (PA as outcome) |             |        |
|-------------------------------|---------------------------|---------------|--------|---------------------------|---------------|--------|--------------------------|-------------|--------|--------------------------|-------------|--------|
|                               | b                         | 95% CI        | p      | b                         | 95% CI        | p      | OR                       | 95% CI      | p      | OR                       | 95% CI      | p      |
| Intercept                     | 0.08                      | -0.01 – 0.18  | 0.071  | 0.05                      | -0.04 – 0.14  | 0.261  | 2.60                     | 2.07 – 3.28 | <0.001 | 2.57                     | 2.04 – 3.23 | <0.001 |
| Material deprivation          | 0.06                      | 0.02 – 0.09   | 0.001  | 0.05                      | 0.02 – 0.08   | 0.004  | 0.86                     | 0.79 – 0.92 | <0.001 | 0.86                     | 0.80 – 0.93 | <0.001 |
| BMI                           |                           |               |        |                           |               |        | 0.82                     | 0.78 – 0.87 | <0.001 | 0.81                     | 0.76 – 0.86 | <0.001 |
| Gender (ref: men)             |                           |               |        | -0.17                     | -0.22 – -0.13 | <0.001 |                          |             |        | 0.80                     | 0.72 – 0.89 | <0.001 |
| Material deprivation x gender |                           |               |        | 0.08                      | 0.03 – 0.13   | 0.001  |                          |             |        | 0.95                     | 0.85 – 1.07 | 0.391  |
| BMI x gender                  |                           |               |        |                           |               |        |                          |             |        | 1.07                     | 0.96 – 1.20 | 0.220  |
| Age                           | -0.11                     | -0.13 – -0.08 | <0.001 | -0.12                     | -0.14 – -0.09 | <0.001 | 0.53                     | 0.49 – 0.57 | <0.001 | 0.52                     | 0.49 – 0.56 | <0.001 |
| <i>Country (ref: Belgium)</i> |                           |               |        |                           |               |        |                          |             |        |                          |             |        |
| Austria                       | 0.16                      | 0.05 – 0.27   | 0.004  | 0.18                      | 0.07 – 0.29   | 0.002  | 1.34                     | 1.03 – 1.76 | 0.031  | 1.36                     | 1.04 – 1.79 | 0.025  |
| Czech Republic                | 0.19                      | 0.10 – 0.28   | <0.001 | 0.20                      | 0.11 – 0.29   | <0.001 | 1.46                     | 1.18 – 1.82 | 0.001  | 1.49                     | 1.20 – 1.86 | <0.001 |
| Denmark                       | -0.13                     | -0.21 – -0.06 | 0.001  | -0.13                     | -0.20 – -0.05 | 0.001  | 1.86                     | 1.51 – 2.30 | <0.001 | 1.88                     | 1.52 – 2.32 | <0.001 |
| France                        | -0.14                     | -0.22 – -0.05 | 0.001  | -0.13                     | -0.21 – -0.05 | 0.002  | 1.64                     | 1.33 – 2.03 | <0.001 | 1.66                     | 1.34 – 2.05 | <0.001 |
| Germany                       | 0.11                      | 0.03 – 0.20   | 0.011  | 0.11                      | 0.03 – 0.20   | 0.009  | 1.61                     | 1.29 – 2.01 | <0.001 | 1.61                     | 1.30 – 2.02 | <0.001 |
| Italy                         | -0.17                     | -0.25 – -0.09 | <0.001 | -0.18                     | -0.26 – -0.10 | <0.001 | 0.83                     | 0.69 – 0.99 | 0.041  | 0.81                     | 0.67 – 0.97 | 0.024  |
| Spain                         | 0.11                      | 0.02 – 0.20   | 0.014  | 0.10                      | 0.01 – 0.19   | 0.023  | 1.51                     | 1.22 – 1.87 | <0.001 | 1.48                     | 1.20 – 1.83 | <0.001 |
| Sweden                        | -0.06                     | -0.15 – 0.02  | 0.129  | -0.05                     | -0.13 – 0.04  | 0.281  | 2.35                     | 1.88 – 2.94 | <0.001 | 2.40                     | 1.92 – 3.01 | <0.001 |
| Switzerland                   | -0.26                     | -0.35 – -0.17 | <0.001 | -0.25                     | -0.34 – -0.15 | <0.001 | 1.76                     | 1.38 – 2.25 | <0.001 | 1.78                     | 1.40 – 2.28 | <0.001 |
| <i>Income (ref: Easily)</i>   |                           |               |        |                           |               |        |                          |             |        |                          |             |        |
| Fairly easily                 | 0.10                      | 0.05 – 0.15   | <0.001 | 0.11                      | 0.06 – 0.16   | <0.001 | 0.79                     | 0.70 – 0.90 | <0.001 | 0.79                     | 0.70 – 0.90 | <0.001 |
| With some difficulty          | 0.14                      | 0.07 – 0.21   | <0.001 | 0.15                      | 0.08 – 0.22   | <0.001 | 0.71                     | 0.60 – 0.84 | <0.001 | 0.71                     | 0.60 – 0.84 | <0.001 |
| With great difficulty         | 0.25                      | 0.13 – 0.37   | <0.001 | 0.25                      | 0.14 – 0.37   | <0.001 | 0.74                     | 0.57 – 0.98 | 0.035  | 0.75                     | 0.57 – 0.99 | 0.042  |

|                                            |       |               |        |       |               |        |      |             |        |      |             |       |
|--------------------------------------------|-------|---------------|--------|-------|---------------|--------|------|-------------|--------|------|-------------|-------|
| <i>Education (ref: Primary)</i>            |       |               |        |       |               |        |      |             |        |      |             |       |
| Secondary                                  | -0.10 | -0.16 – -0.04 | 0.001  | -0.10 | -0.16 – -0.05 | <0.001 | 1.07 | 0.93 – 1.22 | 0.349  | 1.06 | 0.92 – 1.21 | 0.408 |
| Tertiary                                   | -0.27 | -0.35 – -0.20 | <0.001 | -0.27 | -0.34 – -0.20 | <0.001 | 1.35 | 1.12 – 1.63 | 0.002  | 1.35 | 1.11 – 1.63 | 0.002 |
| <i>Occupation status (ref: High skill)</i> |       |               |        |       |               |        |      |             |        |      |             |       |
| Low skill                                  | 0.00  | -0.05 – 0.06  | 0.909  | 0.05  | -0.00 – 0.10  | 0.072  | 0.97 | 0.84 – 1.11 | 0.630  | 1.01 | 0.87 – 1.16 | 0.927 |
| Never worked                               | -0.07 | -0.17 – 0.04  | 0.199  | 0.04  | -0.07 – 0.15  | 0.452  | 0.65 | 0.51 – 0.82 | <0.001 | 0.74 | 0.58 – 0.96 | 0.021 |

*Note:* BMI: body mass index; PA: Physical activity status. Model 1b and Model 2b included interaction terms between gender and material deprivation on BMI (Model 1b) and between gender and material deprivation and BMI and gender on physical activity (Model 2b). Unstandardized b coefficients and odds-ratios (OR) and their 95% confidence intervals (95% CI) are reported.

**Table 3.** Estimates for all predictors in the models including social deprivation (Study 2).

| Predictors                    | Model 1a (BMI as outcome) |               |        | Model 1b (BMI as outcome) |               |        | Model 2a (PA as outcome) |             |        | Model 2b (PA as outcome) |             |        |
|-------------------------------|---------------------------|---------------|--------|---------------------------|---------------|--------|--------------------------|-------------|--------|--------------------------|-------------|--------|
|                               | b                         | 95% CI        | p      | b                         | 95% CI        | p      | OR                       | 95% CI      | p      | OR                       | 95% CI      | p      |
| Intercept                     | 0.06                      | -0.03 – 0.15  | 0.192  | 0.03                      | -0.06 – 0.12  | 0.498  | 2.69                     | 2.15 – 3.38 | <0.001 | 2.66                     | 2.12 – 3.35 | <0.001 |
| Social deprivation            | 0.04                      | 0.02 – 0.06   | 0.001  | 0.04                      | 0.02 – 0.06   | 0.001  | 0.74                     | 0.70 – 0.79 | <0.001 | 0.75                     | 0.71 – 0.80 | <0.001 |
| BMI                           | -                         | -             | -      | -                         | -             | -      | 0.83                     | 0.78 – 0.87 | <0.001 | 0.81                     | 0.77 – 0.86 | <0.001 |
| Gender (ref: men)             | -                         | -             | -      | -0.19                     | -0.23 – -0.15 | <0.001 | -                        | -           | -      | 0.83                     | 0.75 – 0.93 | 0.001  |
| Social deprivation x gender   | -                         | -             | -      | 0.05                      | 0.01 – 0.10   | 0.015  | -                        | -           | -      | 0.95                     | 0.85 – 1.05 | 0.319  |
| BMI x gender                  | -                         | -             | -      | -                         | -             | -      | -                        | -           | -      | 1.07                     | 0.96 – 1.19 | 0.233  |
| Age                           | -0.11                     | -0.14 – -0.09 | <0.001 | -0.12                     | -0.15 – -0.10 | <0.001 | 0.55                     | 0.52 – 0.59 | <0.001 | 0.55                     | 0.51 – 0.59 | <0.001 |
| <i>Country (ref: Belgium)</i> |                           |               |        |                           |               |        |                          |             |        |                          |             |        |
| Austria                       | 0.18                      | 0.07 – 0.29   | 0.001  | 0.19                      | 0.08 – 0.30   | 0.001  | 1.21                     | 0.93 – 1.59 | 0.163  | 1.23                     | 0.94 – 1.62 | 0.137  |
| Czech Republic                | 0.18                      | 0.09 – 0.27   | <0.001 | 0.20                      | 0.11 – 0.29   | <0.001 | 1.63                     | 1.31 – 2.04 | <0.001 | 1.65                     | 1.32 – 2.06 | <0.001 |
| Denmark                       | -0.12                     | -0.19 – -0.04 | 0.003  | -0.11                     | -0.19 – -0.03 | 0.006  | 1.67                     | 1.35 – 2.06 | <0.001 | 1.68                     | 1.36 – 2.08 | <0.001 |
| France                        | -0.13                     | -0.21 – -0.05 | 0.002  | -0.12                     | -0.21 – -0.04 | 0.003  | 1.64                     | 1.33 – 2.03 | <0.001 | 1.66                     | 1.34 – 2.05 | <0.001 |
| Germany                       | 0.13                      | 0.04 – 0.21   | 0.004  | 0.13                      | 0.04 – 0.21   | 0.003  | 1.54                     | 1.24 – 1.93 | <0.001 | 1.55                     | 1.24 – 1.93 | <0.001 |
| Italy                         | -0.17                     | -0.25 – -0.09 | <0.001 | -0.19                     | -0.26 – -0.11 | <0.001 | 0.87                     | 0.73 – 1.05 | 0.156  | 0.86                     | 0.71 – 1.04 | 0.114  |
| Spain                         | 0.12                      | 0.04 – 0.21   | 0.005  | 0.11                      | 0.02 – 0.20   | 0.013  | 1.47                     | 1.19 – 1.82 | <0.001 | 1.45                     | 1.18 – 1.79 | 0.001  |
| Sweden                        | -0.05                     | -0.14 – 0.03  | 0.211  | -0.03                     | -0.12 – 0.05  | 0.428  | 2.22                     | 1.77 – 2.79 | <0.001 | 2.26                     | 1.81 – 2.84 | <0.001 |
| Switzerland                   | -0.25                     | -0.34 – -0.15 | <0.001 | -0.23                     | -0.32 – -0.14 | <0.001 | 1.64                     | 1.29 – 2.10 | <0.001 | 1.66                     | 1.30 – 2.13 | <0.001 |
| <i>Income (ref: Easily)</i>   |                           |               |        |                           |               |        |                          |             |        |                          |             |        |
| Fairly easily                 | 0.11                      | 0.06 – 0.16   | <0.001 | 0.11                      | 0.06 – 0.16   | <0.001 | 0.80                     | 0.70 – 0.91 | 0.001  | 0.80                     | 0.70 – 0.91 | 0.001  |
| With some difficulty          | 0.18                      | 0.11 – 0.24   | <0.001 | 0.19                      | 0.12 – 0.25   | <0.001 | 0.67                     | 0.58 – 0.79 | <0.001 | 0.68                     | 0.58 – 0.79 | <0.001 |
| With great difficulty         | 0.33                      | 0.23 – 0.43   | <0.001 | 0.33                      | 0.23 – 0.43   | <0.001 | 0.69                     | 0.55 – 0.87 | 0.002  | 0.69                     | 0.55 – 0.87 | 0.002  |

|                                            |       |               |        |       |               |        |      |             |       |      |             |       |
|--------------------------------------------|-------|---------------|--------|-------|---------------|--------|------|-------------|-------|------|-------------|-------|
| <i>Education (ref: Primary)</i>            |       |               |        |       |               |        |      |             |       |      |             |       |
| Secondary                                  | -0.10 | -0.15 – -0.04 | 0.001  | -0.10 | -0.16 – -0.05 | <0.001 | 1.03 | 0.90 – 1.18 | 0.644 | 1.03 | 0.90 – 1.18 | 0.708 |
| Tertiary                                   | -0.27 | -0.34 – -0.20 | <0.001 | -0.26 | -0.34 – -0.19 | <0.001 | 1.27 | 1.05 – 1.54 | 0.013 | 1.27 | 1.05 – 1.54 | 0.013 |
| <i>Occupation status (ref: High skill)</i> |       |               |        |       |               |        |      |             |       |      |             |       |
| Low skill                                  | 0.00  | -0.05 – 0.05  | 0.971  | 0.04  | -0.01 – 0.10  | 0.099  | 1.00 | 0.87 – 1.14 | 0.958 | 1.03 | 0.89 – 1.19 | 0.669 |
| Never worked                               | -0.07 | -0.18 – 0.03  | 0.155  | 0.04  | -0.07 – 0.15  | 0.465  | 0.70 | 0.55 – 0.90 | 0.004 | 0.79 | 0.62 – 1.02 | 0.074 |

*Note:* Model 1b and Model 2b included an interaction terms between gender and social deprivation on BMI (Model 1b), between gender and social deprivation and BMI and gender on physical activity (Model 2b). Unstandardized b coefficients and odds-ratios (OR) and their 95% confidence intervals (95% CI) are reported.
